# Supplementary material
Source: MDPI journal article supplement (https://www.mdpi.com/2072-4292/15/21/5261)
Supplement: s1 [file s1]

# Supplementary Materials: Combination of UAV Photogrammetry and Field Inventories Enables Description of Height-Diameter Relationship within Semi-Arid Silvopastoral Systems

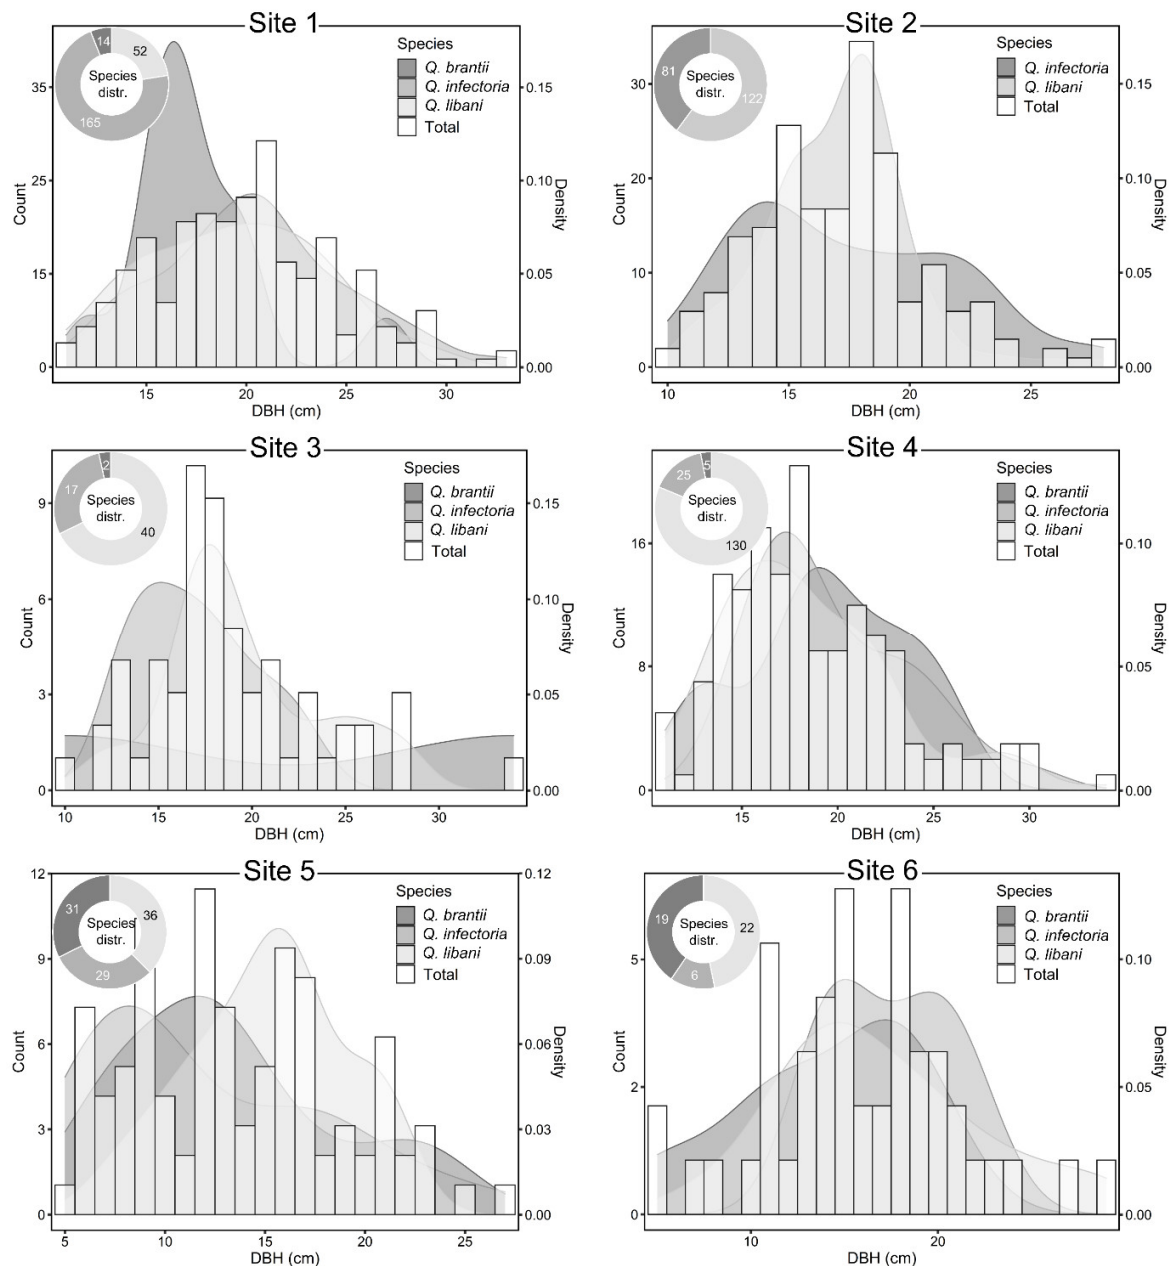

**Figure S1.** Distribution and histogram of maximum DBH by species and total trees.

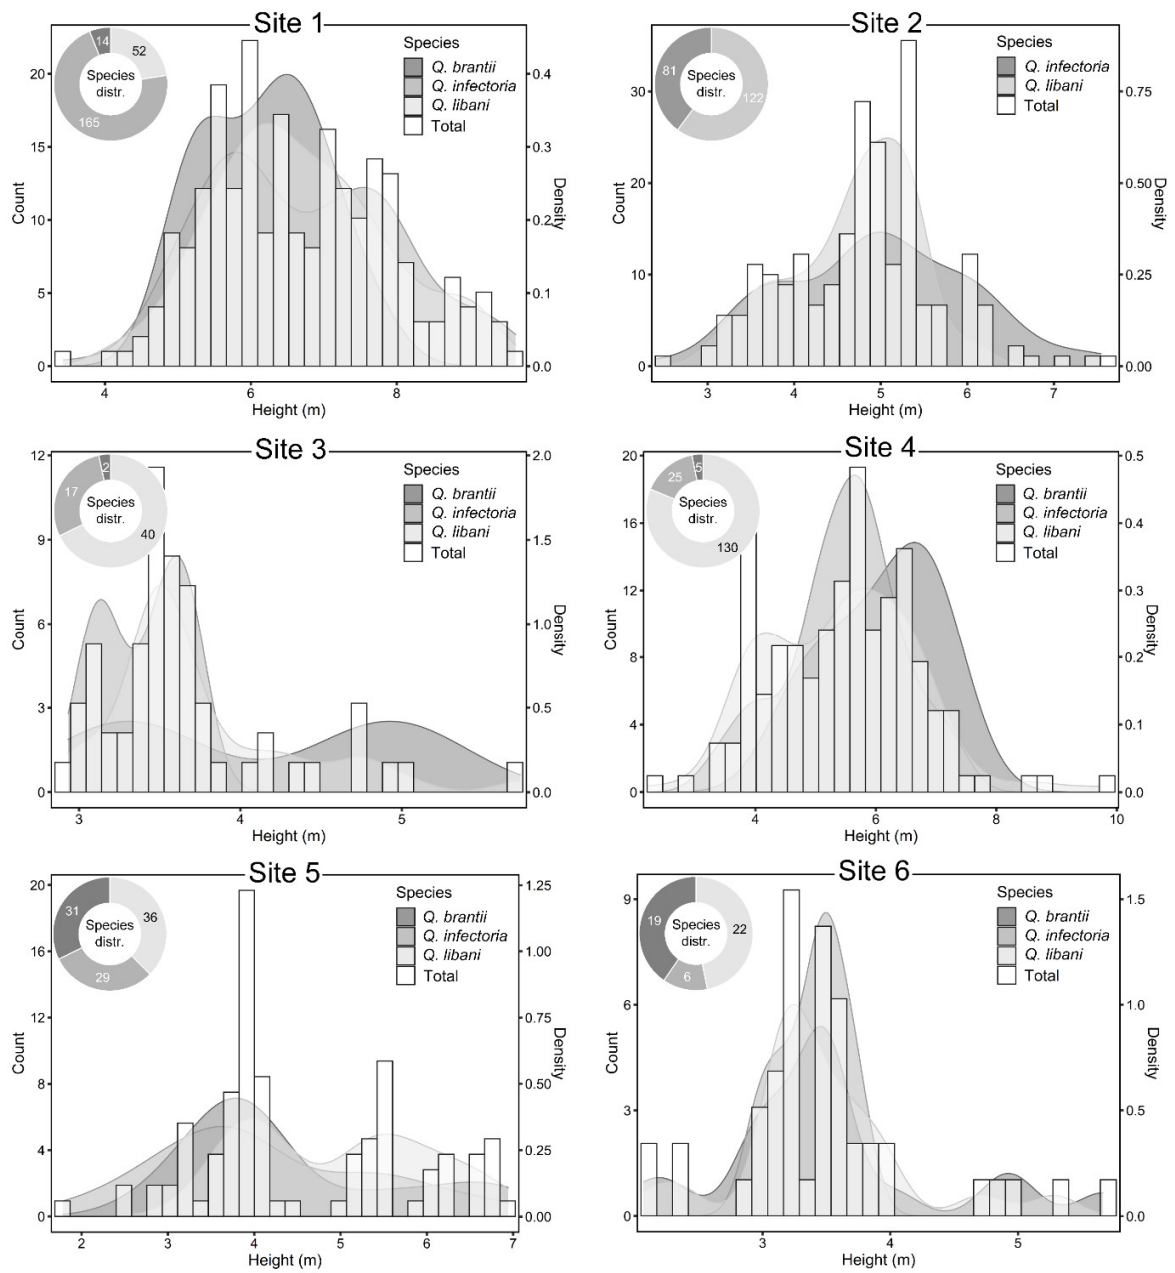

**Figure S2.** Distribution and histogram of tree height by species and total trees.

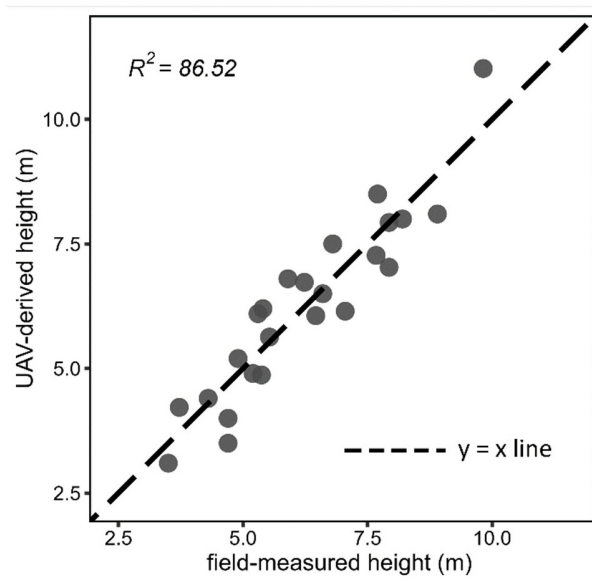

**Figure S3.** Comparing the tree height obtained from the field method and the tree height extracted by UAV photogrammetry
